# Supplementary material for: Posttranslational Arginylation Enzyme Arginyltransferase1 Shows Genetic Interactions With Specific Cellular Pathways in vivo
Source: PubMed Central journal article supplement (PMC7218141; doi:10.3389/fphys.2020.00427), 2020-05-06
Supplement: Table_1.pdf [file Table_1.pdf]

**Supplemental Materials for “Posttranslational arginylation enzyme Arginyltransferase1 shows genetic interactions with specific cellular pathways *in vivo*” by David J. Wiley, Genaro D’Urso, and Fangliang Zhang**

**Inventory:**

**Supplemental Table S1 A, B, C**

**Supplemental Table S2**

**Supplemental Table S3 A, B, C**

**Supplemental Table S1. Gene features that are enriched in the *ate1*-interacting hit list compared to the library pool.** The features of genes were determined by either gene ontology (GO) terms, expression category, or fission yeast phenotype ontology (FYPO), as listed in sub-tables A to C, respectively. The frequency of each category in the 173 gene list showing genetic interacting with *ate1* is compared to the frequency of the same category in the screening library (effective size 3659). Statistics was performed as described in published studies (Bitton, Schubert et al. 2015). In each table, closely related categories were grouped together and separated from other groups by a blank row. Within each group, the entries are sorted by their p values.

| <b>Suppl Table S1A. Gene features that are enriched in the <i>ate1</i>-interacting hit list compared to the library pool, as determined by gene ontology (GO) terms,</b> |                                        |                              |                             |                |                                                                                                                                                                                                                                                                                                                                                                                                                                                                                                                                                                                                                                                     |
|--------------------------------------------------------------------------------------------------------------------------------------------------------------------------|----------------------------------------|------------------------------|-----------------------------|----------------|-----------------------------------------------------------------------------------------------------------------------------------------------------------------------------------------------------------------------------------------------------------------------------------------------------------------------------------------------------------------------------------------------------------------------------------------------------------------------------------------------------------------------------------------------------------------------------------------------------------------------------------------------------|
| <b>GO ID</b>                                                                                                                                                             | <b>GeneSet Name</b>                    | <b>Frequency In Hit list</b> | <b>Frequency In Library</b> | <b>p-Value</b> | <b>Gene Name/Gene ID</b>                                                                                                                                                                                                                                                                                                                                                                                                                                                                                                                                                                                                                            |
| GO: 0009058                                                                                                                                                              | biosynthetic process                   | 50.28901734 (87/173)         | 29.81688986 (1091/3659)     | 1.21E-05       | rpl29, gid5, byr3, pap1, his1, adn2, ade10, clr3, med1, brl1, SPAC3F10.09, rps2802, rpl3001, SPBC56F2.05c, tps2, rps1802, gcn1, atp15, rpa12, his5, plc1, rps1201, SPBC1271.14, ifa38, atd1, mms1, mbx1, rps1502, ubi5, gpd1, arp5, rpl901, cho1, lys9, rpl35b, mas5, SPAC3C7.04, rps2801, rpl15, hmt2, SPAC17G8.06c, est1, cys2, eaf7, ctp1, met10, coq7, rpl26, his7, tpp1, rpp201, rpl1801, atp3, his2, imt2, cuf1, rps1102, laf1, ace2, tef103, lsd90, alp13, trm112, met14, rpl2802, mug183, crf1, atp1, mcl1, rpl902, scs7, rps3001, rpl1102, hos2, rpl3602, mms19, rho2, rpl3702, rps101, ser2, mtq1, lys7, fil1, rpl4302, rep2, tif51, pcr1 |
| GO: 0044249                                                                                                                                                              | cellular biosynthetic process          | 49.71098266 (86/173)         | 29.13364307 (1066/3659)     | 1.21E-05       | rpl29, gid5, byr3, pap1, his1, adn2, ade10, clr3, med1, brl1, SPAC3F10.09, rps2802, rpl3001, SPBC56F2.05c, tps2, rps1802, gcn1, atp15, rpa12, his5, rps1201, SPBC1271.14, ifa38, atd1, mms1, mbx1, rps1502, ubi5, gpd1, arp5, rpl901, cho1, lys9, rpl35b, mas5, SPAC3C7.04, rps2801, rpl15, hmt2, SPAC17G8.06c, est1, cys2, eaf7, ctp1, met10, coq7, rpl26, his7, tpp1, rpp201, rpl1801, atp3, his2, imt2, cuf1, rps1102, laf1, ace2, tef103, lsd90, alp13, trm112, met14, rpl2802, mug183, crf1, atp1, mcl1, rpl902, scs7, rps3001, rpl1102, hos2, rpl3602, mms19, rho2, rpl3702, rps101, ser2, mtq1, lys7, fil1, rpl4302, rep2, tif51, pcr1       |
| GO: 0002181                                                                                                                                                              | cytoplasmic translation Enriched       | 15.60693641 6185 (27/173)    | 4.75539765 (174/3659)       | 2.32E-05       | rpl29, byr3, rps2802, rpl3001, rps1802, rps1201, rps1502, ubi5, rpl901, rpl35b, rps2801, rpl15, rpl26, rpp201, rpl1801, rps1102, tef103, trm112, rpl2802, rpl902, rps3001, rpl1102, rpl3602, rpl3702, rps101, rpl4302, tif51                                                                                                                                                                                                                                                                                                                                                                                                                        |
| GO: 1901576                                                                                                                                                              | organic substance biosynthetic process | 49.13294798 (85/173)         | 29.2976223 (1072/3659)      | 2.42E-05       | rpl29, gid5, byr3, pap1, his1, adn2, ade10, clr3, med1, brl1, SPAC3F10.09, rps2802, rpl3001, SPBC56F2.05c, tps2, rps1802, gcn1, atp15, rpa12, his5, plc1, rps1201, SPBC1271.14, ifa38, atd1, mms1, mbx1, rps1502, ubi5, gpd1, arp5, rpl901, cho1, lys9, rpl35b, mas5, SPAC3C7.04, rps2801, rpl15, hmt2, SPAC17G8.06c, est1, cys2, eaf7, ctp1, coq7, rpl26, his7, tpp1, rpp201, rpl1801, atp3, his2, imt2, cuf1, rps1102, laf1, ace2, tef103, lsd90, alp13, trm112, rpl2802, mug183, crf1, atp1, mcl1, rpl902, scs7, rps3001, rpl1102, hos2, rpl3602, mms19, rho2, rpl3702, rps101, ser2, mtq1, lys7, fil1, rpl4302, rep2, tif51, pcr1               |
| GO: 0006412                                                                                                                                                              | translation                            | 16.76300578 (29/173)         | 6.313200328 (231/3659)      | 0.000393 912   | rpl29, byr3, rps2802, rpl3001, rps1802, gcn1, rps1201, rps1502, ubi5, rpl901, rpl35b, rps2801, rpl15, rpl26, rpp201, rpl1801, rps1102, tef103, trm112, rpl2802, rpl902, rps3001, rpl1102, rpl3602, rpl3702, rps101, mtq1, rpl4302, tif51                                                                                                                                                                                                                                                                                                                                                                                                            |

|             |                                                 |                      |                        |            |                                                                                                                                                                                                                                                                                                                                                                                                                                                                                                             |
|-------------|-------------------------------------------------|----------------------|------------------------|------------|-------------------------------------------------------------------------------------------------------------------------------------------------------------------------------------------------------------------------------------------------------------------------------------------------------------------------------------------------------------------------------------------------------------------------------------------------------------------------------------------------------------|
| GO: 0010467 | gene expression                                 | 38.7283237 (67/173)  | 23.23039082 (850/3659) | 0.00160701 | rpl29, byr3, pap1, adn2, clr3, med1, brl1, rps2802, rpl3001, SPBC56F2.05c, rps1802, gcn1, kae1, rpa12, rps1201, prp17, mms1, mei2, mbx1, rps1502, ubi5, arp5, elf1, rpl901, rpl35b, mex67, vgl1, mas5, mpn1, SPAC3C7.04, rpl15, rps2801, rrp16, eaf7, rpl26, rpp201, rpl1801, cwf21, cuf1, rps1102, laf1, ace2, tef103, cwf11, alp13, rpl2802, trm112, mug183, crf1, mcl1, zfs1, rpl902, rps3001, rpl1102, SPAC29A4.09, hos2, cgr1, rpl3602, rpl3702, mms19, rps101, mtq1, fil1, rpl4302, rep2, tif51, pcr1 |
| GO: 0000105 | histidine biosynthetic process                  | 2.89017341 (5/173)   | 0.191309101 (7/3659)   | 0.00220557 | his1, SPAC3F10.09, his5, his7, his2                                                                                                                                                                                                                                                                                                                                                                                                                                                                         |
| GO: 0006547 | histidine metabolic process                     | 2.89017341 (5/173)   | 0.218638972 (8/3659)   | 0.00481857 | his1, SPAC3F10.09, his5, his7, his2                                                                                                                                                                                                                                                                                                                                                                                                                                                                         |
| GO: 0052803 | imidazole-containing compound metabolic process | 2.89017341 (5/173)   | 0.245968844 (9/3659)   | 0.00938479 | his1, SPAC3F10.09, his5, his7, his2                                                                                                                                                                                                                                                                                                                                                                                                                                                                         |
| GO: 0031137 | regulation of conjugation with cellular fusion  | 4.624277457 (8/173)  | 0.792566275 (29/3659)  | 0.0137569  | ppa2, msa1, mei2, git1, pab1, igo1, zfs1, rgs1                                                                                                                                                                                                                                                                                                                                                                                                                                                              |
| GO: 0046999 | regulation of conjugation                       | 4.624277457 (8/173)  | 0.792566275 (29/3659)  | 0.0137569  | ppa2, msa1, mei2, git1, pab1, igo1, zfs1, rgs1                                                                                                                                                                                                                                                                                                                                                                                                                                                              |
| GO: 0009059 | macromolecule biosynthetic process              | 32.94797688 (57/173) | 20.11478546 (736/3659) | 0.0182045  | rpl29, byr3, pap1, adn2, clr3, med1, brl1, rps2802, rpl3001, SPBC56F2.05c, rps1802, gcn1, rpa12, rps1201, mms1, mbx1, rps1502, ubi5, arp5, rpl901, rpl35b, mas5, SPAC3C7.04, rps2801, rpl15, est1, eaf7, ctp1, rpl26, rpp201, rpl1801, cuf1, rps1102, laf1, ace2, tef103, alp13, trm112, rpl2802, mug183, crf1, mcl1, rpl902, rps3001, rpl1102, hos2, rpl3602, rho2, mms19, rpl3702, rps101, mtq1, fil1, rpl4302, rep2, tif51, pcr1                                                                         |
| GO: 0034645 | cellular macromolecule biosynthetic process     | 32.94797688 (57/173) | 20.08745559 (735/3659) | 0.0182045  | rpl29, byr3, pap1, adn2, clr3, med1, brl1, rps2802, rpl3001, SPBC56F2.05c, rps1802, gcn1, rpa12, rps1201, mms1, mbx1, rps1502, ubi5, arp5, rpl901, rpl35b, mas5, SPAC3C7.04, rps2801, rpl15, est1, eaf7, ctp1, rpl26, rpp201, rpl1801, cuf1, rps1102, laf1, ace2, tef103, alp13, trm112, rpl2802, mug183, crf1, mcl1, rpl902, rps3001, rpl1102, hos2, rpl3602, rho2, mms19, rpl3702, rps101, mtq1, fil1, rpl4302, rep2, tif51, pcr1                                                                         |
| GO: 0022626 | cytosolic ribosome                              | 13.87283237 (24/173) | 3.552883301 (130/3659) | 1.21E-05   | rpl29, rps2802, rpl3001, rps1802, rps1201, rps1502, ubi5, rpl901, rpl35b, rps2801, rpl15, rpl26, rpp201, rpl1801, rps1102, rpl2802, rpl902, rps3001, rpl1102, rpl3602, rpl3702, rps101, rpl4302, tif51                                                                                                                                                                                                                                                                                                      |
| GO: 0044445 | cytosolic part                                  | 14.45086705 (25/173) | 3.853511888 (141/3659) | 1.21E-05   | rpl29, rps2802, rpl3001, rps1802, rps1201, rps1502, ubi5, rpl901, rpl35b, rps2801, rpl15, rpl26, rpp201, rpl1801, rps1102, rpl2802, rpl902, rps3001, rpl1102, rpl3602, mms19, rpl3702, rps101, rpl4302, tif51                                                                                                                                                                                                                                                                                               |
| GO: 0005840 | ribosome                                        | 13.87283237 (24/173) | 4.044820989 (148/3659) | 4.67E-05   | rpl29, rps2802, rpl3001, rps1802, rps1201, rps1502, ubi5, rpl901, rpl35b, rps2801, rpl15, rpl26, rpp201, rpl1801, rps1102, rpl2802, rpl902, rps3001, rpl1102, rpl3602, rpl3702, rps101, rpl4302, tif51                                                                                                                                                                                                                                                                                                      |
| GO: 0044391 | ribosomal subunit                               | 13.29479769 (23/173) | 3.771522274 (138/3659) | 5.01E-05   | rpl29, rps2802, rpl3001, rps1802, rps1201, rps1502, ubi5, rpl901, rpl35b, rps2801, rpl15, rpl26, rpp201, rpl1801, rps1102, rpl2802, rpl902, rps3001, rpl1102, rpl3602, rpl3702, rps101, rpl4302                                                                                                                                                                                                                                                                                                             |
| GO: 0030529 | ribonucleoprotein complex                       | 17.91907514 (31/173) | 7.652364034 (280/3659) | 0.00242179 | rpl29, rps2802, rpl3001, rps1802, rps1201, prp17, mei2, rps1502, ubi5, rpl901, rpl35b, vgl1, rps2801, rpl15, est1, rpl26, rpp201, rpl1801, cwf21, rps1102, cwf11, rpl2802, rpl902, rps3001, rpl1102, rpl3602, rpl3702, rps101, rpl4302, tif51                                                                                                                                                                                                                                                               |
| GO: 0022625 | cytosolic large                                 | 8.092485549 (14/173) | 1.995080623 (73/3659)  | 0.00247116 | rpl29, rpl3001, rpl901, rpl35b, rpl15, rpl26, rpp201, rpl1801, rpl2802, rpl902, rpl1102, rpl3602, rpl3702, rpl4302                                                                                                                                                                                                                                                                                                                                                                                          |

|             |                                    |                      |                        |              |                                                                                                                                                                                                 |
|-------------|------------------------------------|----------------------|------------------------|--------------|-------------------------------------------------------------------------------------------------------------------------------------------------------------------------------------------------|
|             | ribosomal subunit                  |                      |                        |              |                                                                                                                                                                                                 |
| GO: 0015934 | large ribosomal subunit            | 8.092485549 (14/173) | 2.186389724 (80/3659)  | 0.006492 3   | rpl29, rpl3001, rpl901, rpl35b, rpl15, rpl26, rpp201, rpl1801, rpl2802, rpl902, rpl1102, rpl3602, rpl3702, rpl4302                                                                              |
| GO: 0003735 | structural constituent of ribosome | 13.29479769 (23/173) | 3.580213173 (131/3659) | 2.42E-05     | rpl29, rps2802, rpl3001, rps1802, rps1201, rps1502, ubi5, rpl901, rpl35b, rps2801, rpl15, rpl26, rpp201, rpl1801, rps1102, rpl2802, rpl902, rps3001, rpl1102, rpl3602, rpl3702, rps101, rpl4302 |
| GO: 0005198 | structural molecule activity       | 13.29479769 (23/173) | 4.345449576 (159/3659) | 0.000512 802 | rpl29, rps2802, rpl3001, rps1802, rps1201, rps1502, ubi5, rpl901, rpl35b, rps2801, rpl15, rpl26, rpp201, rpl1801, rps1102, rpl2802, rpl902, rps3001, rpl1102, rpl3602, rpl3702, rps101, rpl4302 |

**Suppl Table S1B. Gene features that are enriched in the *ate1*-interacting hit list compared to the library pool, as determined by the fission yeast phenotype ontology (FYPO)**

| FYPO ID       | GeneSet Name                                    | Frequency In Hit list | Frequency In Library    | P-Value     | Gene Name/ID                                                                                                                                                                                                                                                                                                                                                                                                                                   |
|---------------|-------------------------------------------------|-----------------------|-------------------------|-------------|------------------------------------------------------------------------------------------------------------------------------------------------------------------------------------------------------------------------------------------------------------------------------------------------------------------------------------------------------------------------------------------------------------------------------------------------|
| FYPO: 0002197 | viable vegetative cell with abnormal cell shape | 30.635838 15 (53/173) | 17.409128 18 (637/3659) | 0.00509 841 | pap1, clr3, ric1, brl1, rpl3001, vas2, rps1802, plc1, efc25, atd1, mms1, prp17, mbx1, lip2, kap123, clg1, gpd1, arp5, elf1, rpl901, mas5, mpn1, rpl15, pnk1, puf4, nod1, ctp1, spn4, puc1, spn1, rga6, imt2, cuf1, rps1102, SPBC1711.09c, pab1, ace2, cwf11, rud3, alp13, met14, trm112, crf1, mcl1, zfs1, rpl902, mre11, cgr1, mms19, rpl3702, rep2, sft1, pcr1                                                                               |
| FYPO: 0000005 | abnormal cell morphology                        | 37.572254 34 (65/173) | 24.186936 32 (885/3659) | 0.01820 45  | pap1, ppa2, adn2, ade10, clr3, ric1, brl1, rpl3001, vas2, rps1802, plc1, efc25, atd1, prp17, mms1, mbx1, lip2, kap123, gpd1, clg1, arp5, elf1, rpl901, mad1, mas5, mpn1, rpl15, pnk1, git1, est1, puf4, nod1, ctp1, dml1, spn4, puc1, spn1, rga6, imt2, cuf1, rps1102, SPBC1711.09c, rtn1, pab1, ace2, tef103, cwf11, rud3, alp13, rpl2802, trm112, met14, igo1, crf1, mcl1, zfs1, rpl902, mre11, cgr1, rpl3702, mms19, rho2, rep2, sft1, pcr1 |
| FYPO: 0001118 | abnormal vegetative cell morphology             | 27.745664 74 (48/173) | 15.960644 98 (584/3659) | 0.02067 95  | pap1, ppa2, adn2, ade10, brl1, efc25, atd1, mms1, prp17, mbx1, gpd1, elf1, rpl901, mad1, mas5, mpn1, pnk1, git1, est1, nod1, ctp1, dml1, spn4, puc1, spn1, rga6, imt2, cuf1, rps1102, rtn1, pab1, ace2, tef103, cwf11, alp13, trm112, rpl2802, crf1, mcl1, zfs1, mre11, cgr1, mms19, rho2, rpl3702, rep2, sft1, pcr1                                                                                                                           |
| FYPO: 0001126 | abnormal cell shape                             | 35.838150 29 (62/173) | 22.984421 97 (841/3659) | 0.02593 28  | pap1, ppa2, adn2, ade10, clr3, ric1, brl1, rpl3001, vas2, rps1802, plc1, efc25, atd1, mms1, prp17, mbx1, lip2, kap123, clg1, gpd1, arp5, elf1, rpl901, mad1, mas5, mpn1, rpl15, pnk1, est1, puf4, nod1, ctp1, spn4, puc1, spn1, rga6, imt2, cuf1, rps1102, SPBC1711.09c, rtn1, pab1, ace2, cwf11, rud3, alp13, met14, trm112, rpl2802, igo1, crf1, mcl1, zfs1, rpl902, mre11, cgr1, mms19, rho2, rpl3702, sft1, rep2, pcr1                     |
| FYPO: 0000280 | sterile                                         | 1.7341040 46 (3/173)  | 0.0819896 15 (3/3659)   | 0.02962 93  | efc25, igo1, rgs1                                                                                                                                                                                                                                                                                                                                                                                                                              |

|                  |                                                               |                             |                               |               |                                                                                                                                                                                            |
|------------------|---------------------------------------------------------------|-----------------------------|-------------------------------|---------------|--------------------------------------------------------------------------------------------------------------------------------------------------------------------------------------------|
| FYPO:<br>0002068 | growth auxotrophic for histidine                              | 2.3121387<br>28<br>(4/173)  | 0.1639792<br>29<br>(6/3659)   | 0.02067<br>95 | his1, his5, his7, his2                                                                                                                                                                     |
| FYPO:<br>0004139 | altered level of substance in cell during nitrogen starvation | 4.6242774<br>57<br>(8/173)  | 0.8745558<br>9<br>(32/3659)   | 0.02524<br>7  | pap1, ppa2, msa1, mei2, pab1, igo1, zfs1, pcr1                                                                                                                                             |
| FYPO:<br>0003559 | sensitive to doxorubicin                                      | 8.6705202<br>31<br>(15/173) | 2.6236676<br>69<br>(96/3659)  | 0.01232<br>24 | rpa12, atd1, mms1, arp5, vgl1, cox6, git1, est1, puf4, apl6, ctp1, coq7, mcl1, mre11, cox19                                                                                                |
| FYPO:<br>0000115 | sensitive to valproic acid                                    | 10.404624<br>28<br>(18/173) | 3.9901612<br>46<br>(146/3659) | 0.03809<br>54 | pap1, ric1, puf1, vas2, clg1, lys9, mpn1, rps2801, hmt2, puf4, apl6, cys2, SPBC354.07c, rud3, mcl1, scs7, mms19, fil1                                                                      |
| FYPO:<br>0004325 | sensitive to 5-fluorouracil                                   | 16.763005<br>78<br>(29/173) | 8.1169718<br>5<br>(297/3659)  | 0.03910<br>98 | pap1, ppa2, med1, ric1, brl1, rpl3001, vas2, rpa12, efc25, clg1, ftp105, vgl1, mas5, pnk1, eaf7, rpl1801, spn1, cwf21, cuf1, ace2, rud3, alp13, igo1, crf1, scs7, hos2, cox19, mms19, fil1 |

**Suppl Table S1C. Gene features that are enriched in the *ate1*-interacting hit list compared to the library pool, as determined by expression category**

| Category Name   | GeneSet Name                                 | Frequency In Hit list   | Frequency In Library      | P-Value         | Gene Name/ID                                                                                                                                                                                                                                                                                                    |
|-----------------|----------------------------------------------|-------------------------|---------------------------|-----------------|-----------------------------------------------------------------------------------------------------------------------------------------------------------------------------------------------------------------------------------------------------------------------------------------------------------------|
| Gene Expression | Highly expressed genes                       | 23.12138728<br>(40/173) | 8.936867997<br>(327/3659) | 1.21E-05        | rpl29, byr3, ppa2, his1, ade10, SPBC1703.13c, rps2802, rpl3001, rps1802, qcr8, ght8, rps1201, atd1, mei2, rps1502, ubi5, clg1, gpd1, rpl901, lys9, rpl35b, vgl1, mas5, rps2801, hmt2, rpl26, rpp201, rpl1801, sod2, rps1102, rtn1, tef103, rpl2802, rpl902, rps3001, rpl1102, rpl3602, rpl3702, rps101, rpl4302 |
| Gene Expression | Oxidative Stress Cluster 9                   | 13.29479769<br>(23/173) | 3.334244329<br>(122/3659) | 1.21E-05        | rpl29, rps2802, rpl3001, rps1802, rps1201, rps1502, rpl901, rpl35b, rps2801, rpl15, rpl26, rpp201, rpl1801, rps1102, met14, rpl2802, rpl902, rps3001, rpl1102, rpl3602, rpl3702, rps101, rpl4302                                                                                                                |
| Gene Expression | Ribosomal protein module Homol D E           | 16.76300578<br>(29/173) | 4.810057393<br>(176/3659) | 1.21E-05        | rpl29, his1, ade10, rps2802, rpl3001, rps1802, rps1201, rps1502, rpl901, rpl35b, rps2801, SPAC17G8.06c, met10, rpl26, rpp201, rpl1801, his2, rps1102, met14, rpl2802, rpl902, rps3001, rpl1102, rpl3602, rpl3702, ser2, rps101, rpl4302, tif51                                                                  |
| Gene Expression | Core Environmental Stress Response repressed | 20.23121387<br>(35/173) | 7.324405575<br>(268/3659) | 1.91E-05        | rpl29, byr3, ade10, rps2802, rpl3001, msa1, rps1802, rpa12, his5, rps1201, mei2, rps1502, kap123, rpl901, rpl35b, rpl15, rps2801, SPAC17G8.06c, rrp16, rpl26, SPAC144.01, rpp201, rpl1801, rps1102, laf1, ace2, met14, rpl2802, rpl902, rps3001, rpl1102, cgr1, rpl3602, rps101, ser2                           |
| Gene Expression | Oxidative Stress Cluster 11                  | 11.56069364<br>(20/173) | 2.705657283<br>(99/3659)  | 2.27E-05        | rpl29, rps2802, rpl3001, rps1802, rps1502, rpl901, rpl35b, rps2801, rpl15, rpl26, rpp201, rpl1801, rps1102, met14, rpl2802, rpl902, rps3001, rpl1102, rpl3602, rps101                                                                                                                                           |
| Gene Expression | Oxidative Stress Cluster 6                   | 13.29479769<br>(23/173) | 3.607543045<br>(132/3659) | 2.42E-05        | rpl29, rps2802, rpl3001, rps1802, his5, rps1201, rps1502, rpl901, rpl35b, rps2801, rpl15, SPAC17G8.06c, rpl26, rpp201, rpl1801, rps1102, met14, rpl2802, rpl902, rps3001, rpl1102, rpl3602, rps101                                                                                                              |
| Gene Expression | Ribosomal protein module 2                   | 16.1849711<br>(28/173)  | 5.684613282<br>(208/3659) | 0.000181<br>039 | rpl29, his1, ade10, rps2802, rpl3001, rps1802, rps1201, rpl901, lys9, rpl35b, rps2801, SPAC17G8.06c, cys2, met10, rpl26, rpp201, rpl1801, rps1102, met14, rpl2802, rpl902, rps3001, rpl1102, rpl3602, rpl3702, ser2, rps101, tif51                                                                              |
| Gene Expression | Caffeine and Rapamycin repressed             | 12.71676301<br>(22/173) | 5.46597431<br>(200/3659)  | 0.048865<br>1   | rpl29, byr3, puf1, rps2802, dhm1, rpl3001, rps1802, rpa12, rps1502, kap123, rps2801, rpl15, rrp16, SPAC144.01, rpp201, rpl1801, rps1102, met14, trm112, rpl2802, rpl1102, ser2                                                                                                                                  |

**Supplemental Table S2. The functions of genes interacting with *ate1*, based on Panther Functional Analysis by pathway, protein class, molecular function, cellular component, or biological responses.**

| <b>Pathway</b>                                                                          | <b># of Genes</b> |
|-----------------------------------------------------------------------------------------|-------------------|
| Histidine biosynthesis (P02747)                                                         | 5                 |
| EGF receptor signaling pathway (P00018)                                                 | 3                 |
| FGF signaling pathway (P00021)                                                          | 3                 |
| ATP synthesis (P02721)                                                                  | 2                 |
| Angiogenesis (P00005)                                                                   | 2                 |
| PDGF signaling pathway (P00047)                                                         | 2                 |
| Sulfate assimilation (P02778)                                                           | 2                 |
| Wnt signaling pathway (P00057)                                                          | 2                 |
| Valine biosynthesis (P02785)                                                            | 1                 |
| Lipoate_biosynthesis (P02750)                                                           | 1                 |
| Histamine H1 receptor mediated signaling pathway (P04385)                               | 1                 |
| Integrin signalling pathway (P00034)                                                    | 1                 |
| Insulin/IGF pathway-mitogen activated protein kinase kinase/MAP kinase cascade (P00032) | 1                 |
| Inflammation mediated by chemokine and cytokine signaling pathway (P00031)              | 1                 |
| De novo purine biosynthesis (P02738)                                                    | 1                 |
| p53 pathway feedback loops 2 (P04398)                                                   | 1                 |
| p53 pathway by glucose deprivation (P04397)                                             | 1                 |
| Cytoskeletal regulation by Rho GTPase (P00016)                                          | 1                 |
| Thyrotropin-releasing hormone receptor signaling pathway (P04394)                       | 1                 |
| Ras Pathway (P04393)                                                                    | 1                 |
| Oxytocin receptor mediated signaling pathway (P04391)                                   | 1                 |
| Isoleucine biosynthesis (P02748)                                                        | 1                 |
| Serine glycine biosynthesis (P02776)                                                    | 1                 |
| p53 pathway (P00059)                                                                    | 1                 |
| 5HT2 type receptor mediated signaling pathway (P04374)                                  | 1                 |
| VEGF signaling pathway (P00056)                                                         | 1                 |
| 5-Hydroxytryptamine degradation (P04372)                                                | 1                 |

| <b>Protein Class</b>           | <b># of Genes</b> |
|--------------------------------|-------------------|
| nucleic acid binding (PC00171) | 34                |
| hydrolase (PC00121)            | 18                |
| oxidoreductase (PC00176)       | 12                |
| enzyme modulator (PC00095)     | 7                 |
| transporter (PC00227)          | 6                 |
| transcription factor (PC00218) | 5                 |

|                                    |   |
|------------------------------------|---|
| membrane traffic protein (PC00150) | 4 |
| transferase (PC00220)              | 4 |
| cytoskeletal protein (PC00085)     | 4 |
| lyase (PC00144)                    | 1 |
| transfer/carrier protein (PC00219) | 1 |
| ligase (PC00142)                   | 1 |
| receptor (PC00197)                 | 1 |
| calcium-binding protein (PC00060)  | 1 |
| isomerase (PC00135)                | 1 |

| <b>Molecular Function</b>                     | <b># of Genes</b> |
|-----------------------------------------------|-------------------|
| catalytic activity (GO:0003824)               | 46                |
| binding (GO:0005488)                          | 42                |
| structural molecule activity (GO:0005198)     | 22                |
| transporter activity (GO:0005215)             | 9                 |
| transcription regulator activity (GO:0140110) | 4                 |
| molecular function regulator (GO:0098772)     | 3                 |
| translation regulator activity (GO:0045182)   | 2                 |

| <b>Cellular Component</b>               | <b># of Genes</b> |
|-----------------------------------------|-------------------|
| cell (GO:0005623)                       | 71                |
| organelle (GO:0043226)                  | 38                |
| protein-containing complex (GO:0032991) | 15                |
| membrane (GO:0016020)                   | 4                 |

| <b>Biological Response</b>                                 | <b># of Genes</b> |
|------------------------------------------------------------|-------------------|
| metabolic process (GO:0008152)                             | 48                |
| cellular process (GO:0009987)                              | 42                |
| localization (GO:0051179)                                  | 19                |
| biological regulation (GO:0065007)                         | 13                |
| cellular component organization or biogenesis (GO:0071840) | 5                 |
| response to stimulus (GO:0050896)                          | 1                 |
| multicellular organismal process (GO:0032501)              | 1                 |

**Supplemental Table S3. Genes that are generally related to protein ubiquitination and degradation present in the screening library.** These include genes coding for: (A) ubiquitin, ubiquitin ligase, or ubiquitin-like protein; (B) proteins that interact selectively and non-covalently with ubiquitin; (C) ubiquitin or ubiquitin-like proteins; (D) components of ubiquitin ligase complex; (E) component of proteasome; (F) components and regulators of lysosome; (G) components and regulators of lysosome; (H) components and regulators of autolysosome; (I) proteases, peptidase, and protein modification enzymes that are generally involved in protein degradation. Only two of these genes, *ubi5* and *atg14*, are present in the *ate1*-interacting hit list.

| <b>Table S3A: Genes related to “protein ubiquitination”</b> |                  |                      |                  |
|-------------------------------------------------------------|------------------|----------------------|------------------|
| <b>GO:0016567</b>                                           |                  |                      |                  |
| <b>Screening Library</b>                                    |                  | <b>Hit List</b>      |                  |
| <b>Systematic_ID</b>                                        | <b>Gene_Name</b> | <b>Systematic_ID</b> | <b>Gene_Name</b> |
| SPAC13G6.01c                                                | rad8             | SPAC589.10c          | ubi5             |
| SPBC36B7.05c                                                | pib1             |                      |                  |
| SPAC21E11.05c                                               | cyp8             |                      |                  |
| SPAC20H4.10                                                 | ufd2             |                      |                  |
| SPAC328.02                                                  | dbl4             |                      |                  |
| SPAC1002.14                                                 | itt1             |                      |                  |
| SPAC11G7.02                                                 | pub1             |                      |                  |
| SPAC6G10.11c                                                | ubi3             |                      |                  |
| SPAC17G8.10c                                                | dma1             |                      |                  |
| SPAC589.10c                                                 | ubi5             |                      |                  |
| SPAC11G7.04                                                 | ubi1             |                      |                  |
| SPAC16C9.04c                                                | mot2             |                      |                  |
| SPAC15A10.11                                                | ubr11            |                      |                  |
| SPAC1565.07c                                                | knd1             |                      |                  |
| SPAC1805.15c                                                | pub2             |                      |                  |
| SPBC19C7.02                                                 | ubr1             |                      |                  |
| SPBC337.08c                                                 | ubi4             |                      |                  |
| SPBC16E9.11c                                                | pub3             |                      |                  |
| SPAC1805.12c                                                | uep1             |                      |                  |

| <b>Table S3B: Genes related to “ubiquitin binding”</b> |                  |                      |                  |
|--------------------------------------------------------|------------------|----------------------|------------------|
| <b>GO:0043130</b>                                      |                  |                      |                  |
| <b>Screening Library</b>                               |                  | <b>Hit List</b>      |                  |
| <b>Systematic_ID</b>                                   | <b>Gene_Name</b> | <b>Systematic_ID</b> | <b>Gene_Name</b> |
| SPAC343.09                                             | ubx3             |                      |                  |
| SPAC3F10.13                                            | ucp6             |                      |                  |
| SPAC2C4.15c                                            | ubx2             |                      |                  |



|               |              |  |  |
|---------------|--------------|--|--|
| SPAC637.10c   | rpn10        |  |  |
| SPBC83.01     | ucp8         |  |  |
| SPBC16E9.02c  | SPBC16E9.02c |  |  |
| SPBC2D10.12   | rhp23        |  |  |
| SPBC25H2.05   | egd2         |  |  |
| SPBC887.04c   | lub1         |  |  |
| SPCC1235.03   | cue2         |  |  |
| SPCC1906.02c  | cue3         |  |  |
| SPAC16E8.01   | shd1         |  |  |
| SPBC3B9.09    | vps36        |  |  |
| SPBC428.08c   | clr4         |  |  |
| SPAC1486.02c  | dsc2         |  |  |
| SPAC23H3.08c  | bub3         |  |  |
| SPBC9B6.03    | SPBC9B6.03   |  |  |
| SPBC25H2.16c  | gga22        |  |  |
| SPAC19A8.05c  | sst4         |  |  |
| SPAC1F3.05    | gga21        |  |  |
| SPCC16A11.16c | rpn1302      |  |  |
| SPBC16A3.05c  | rae1         |  |  |
| SPCC613.12c   | raf1         |  |  |
| SPBC342.04    | rpn1301      |  |  |
| SPAC31A2.14   | bun107       |  |  |

| <b>Table S3C: Genes related to “Ubiquitin (protein tag)”</b> |                  |                      |                  |
|--------------------------------------------------------------|------------------|----------------------|------------------|
| <b>GO:0031386</b>                                            |                  |                      |                  |
| <b>Screening Library</b>                                     |                  | <b>Hit List</b>      |                  |
| <b>Systematic_ID</b>                                         | <b>Gene_Name</b> | <b>Systematic_ID</b> | <b>Gene_Name</b> |
| SPAC1783.06c                                                 | atg12            | SPAC589.10c          | ubi5             |
| SPBC337.08c                                                  | ubi4             |                      |                  |
| SPBC365.06                                                   | pmt3             |                      |                  |
| SPAC6G10.11c                                                 | ubi3             |                      |                  |
| SPAC1805.12c                                                 | uep1             |                      |                  |
| SPAC11G7.04                                                  | ubi1             |                      |                  |
| SPAC589.10c                                                  | ubi5             |                      |                  |

| <b>Table S3D: Genes related to “Ubiquitin Ligase Complex”</b> |                  |                      |                  |
|---------------------------------------------------------------|------------------|----------------------|------------------|
| <b>GO:0000151</b>                                             |                  |                      |                  |
| <b>Screening Library</b>                                      |                  | <b>Hit List</b>      |                  |
| <b>Systematic_ID</b>                                          | <b>Gene_Name</b> | <b>Systematic_ID</b> | <b>Gene_Name</b> |
| SPAPB1A10.14                                                  | pof15            |                      |                  |
| SPAC13D6.04c                                                  | btb3             |                      |                  |
| SPAC6F6.02c                                                   | pof5             |                      |                  |
| SPBC1271.01c                                                  | pof13            |                      |                  |
| SPBC3H7.06c                                                   | pof9             |                      |                  |
| SPBC25B2.06c                                                  | btb2             |                      |                  |
| SPBC25B2.11                                                   | pof2             |                      |                  |
| SPBC1703.06                                                   | pof10            |                      |                  |
| SPBC56F2.01                                                   | pof12            |                      |                  |
| SPCC330.11                                                    | btb1             |                      |                  |
| SPCC338.16                                                    | pof3             |                      |                  |
| SPCC1827.08c                                                  | pof7             |                      |                  |
| SPAC20H4.10                                                   | ufd2             |                      |                  |
| SPAC17G8.10c                                                  | dma1             |                      |                  |
| SPAC1002.14                                                   | itt1             |                      |                  |
| SPBC19C7.02                                                   | ubr1             |                      |                  |
| SPAC15A10.11                                                  | ubr11            |                      |                  |
| SPAC328.02                                                    | dbl4             |                      |                  |
| SPBC839.03c                                                   | dcn1             |                      |                  |
| SPAPJ691.02                                                   | SPAPJ691.02      |                      |                  |

| <b>Table S3E: Genes related to “Proteasome Complex”</b> |                  |                      |                  |
|---------------------------------------------------------|------------------|----------------------|------------------|
| <b>GO:0000502</b>                                       |                  |                      |                  |
| <b>Screening Library</b>                                |                  | <b>Hit List</b>      |                  |
| <b>Systematic_ID</b>                                    | <b>Gene_Name</b> | <b>Systematic_ID</b> | <b>Gene_Name</b> |
| SPAC3G6.02                                              | rpn15            |                      |                  |

| <b>Table S3F: Genes related to “lysosome”</b> |                  |                      |                  |
|-----------------------------------------------|------------------|----------------------|------------------|
| <b>GO:0005764</b>                             |                  |                      |                  |
| <b>Screening Library</b>                      |                  | <b>Hit List</b>      |                  |
| <b>Systematic_ID</b>                          | <b>Gene_Name</b> | <b>Systematic_ID</b> | <b>Gene_Name</b> |
| SPAPB1A10.10c                                 | ypt71            |                      |                  |
| SPCC777.05                                    | gtr2             |                      |                  |
| SPCC16A11.01                                  | sfk1             |                      |                  |
| SPBC337.13c                                   | gtr1             |                      |                  |
| SPBC405.04c                                   | ypt7             |                      |                  |

| <b>Table S3G: Genes related to “autophagy”</b> |                  |                      |                  |
|------------------------------------------------|------------------|----------------------|------------------|
| <b>GO:0006914</b>                              |                  |                      |                  |
| <b>Screening Library</b>                       |                  | <b>Hit List</b>      |                  |
| <b>Systematic_ID</b>                           | <b>Gene_Name</b> | <b>Systematic_ID</b> | <b>Gene_Name</b> |
| SPAC1D4.03c                                    | aut12            |                      |                  |
| SPAC1687.09                                    | irs4             |                      |                  |
| SPAC14C4.11                                    | vtc2             |                      |                  |
| SPBC28E12.06c                                  | lvs1             |                      |                  |
| SPAC1783.06c                                   | atg12            |                      |                  |
| SPAC19B12.08                                   | atg4             |                      |                  |
| SPAC23C4.16c                                   | atg15            |                      |                  |
| SPAC458.06                                     | atg1803          |                      |                  |
| SPAC589.07c                                    | atg1801          |                      |                  |
| SPAC823.16c                                    | atg1802          |                      |                  |
| SPBC15D4.07c                                   | atg9             |                      |                  |
| SPBC31E1.01c                                   | atg2             |                      |                  |
| SPBC3B9.06c                                    | atg3             |                      |                  |
| SPBC4B4.10c                                    | atg5             |                      |                  |
| SPBC6B1.05c                                    | atg7             |                      |                  |
| SPBC1711.11                                    | atg2402          |                      |                  |
| SPAC6F6.12                                     | atg24            |                      |                  |
| SPAC227.04                                     | atg10            |                      |                  |

| <b>Table S3H: Genes related to “autophagosome”</b> |                  |                      |                  |
|----------------------------------------------------|------------------|----------------------|------------------|
| <b>GO:0005776</b>                                  |                  |                      |                  |
| <b>Screening Library</b>                           |                  | <b>Hit List</b>      |                  |
| <b>Systematic_ID</b>                               | <b>Gene_Name</b> | <b>Systematic_ID</b> | <b>Gene_Name</b> |
| SPAC6F6.12                                         | atg24            | SPAC25A8.02          | atg14            |
| SPBC1711.11                                        | atg2402          |                      |                  |
| SPBC15D4.07c                                       | atg9             |                      |                  |
| SPAC25A8.02                                        | atg14            |                      |                  |

**Table S3-I: Genes related to “protein catabolic process”****GO:0030163**

| <b>Screening Library</b> |                  | <b>Hit List</b>      |                  |
|--------------------------|------------------|----------------------|------------------|
| <b>Systematic_ID</b>     | <b>Gene_Name</b> | <b>Systematic_ID</b> | <b>Gene_Name</b> |
| SPAC13A11.05             | ysp2             |                      |                  |
| SPBC8D2.01               | gsk31            |                      |                  |
| SPCC1322.05c             | lap2             |                      |                  |
| SPCC1795.09              | yps1             |                      |                  |
| SPBC23E6.03c             | nta1             |                      |                  |
